# Supplementary figures and images for: Multiple injections of human umbilical cord-derived mesenchymal stromal cells through the tail vein improve microcirculation and the microenvironment in a rat model of radiation myelopathy
Source: Springer Nature journal article supplement (doi:10.1186/s12967-014-0246-6), 2014-09-07

### IL-1 $\beta$

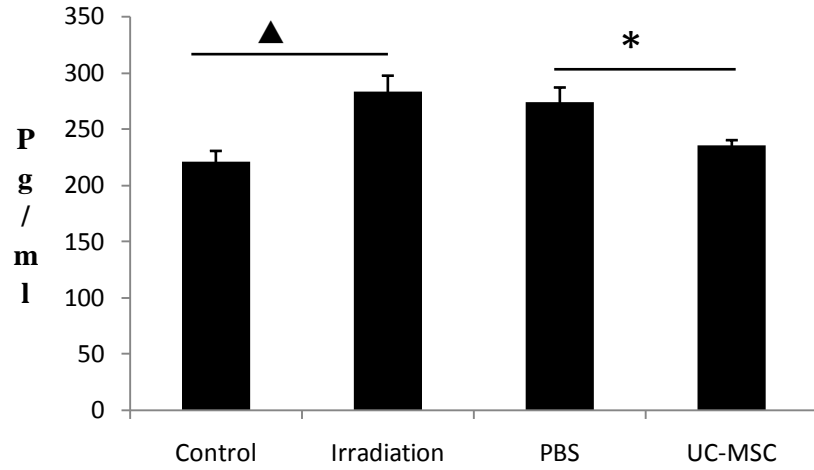

### TNF- $\alpha$

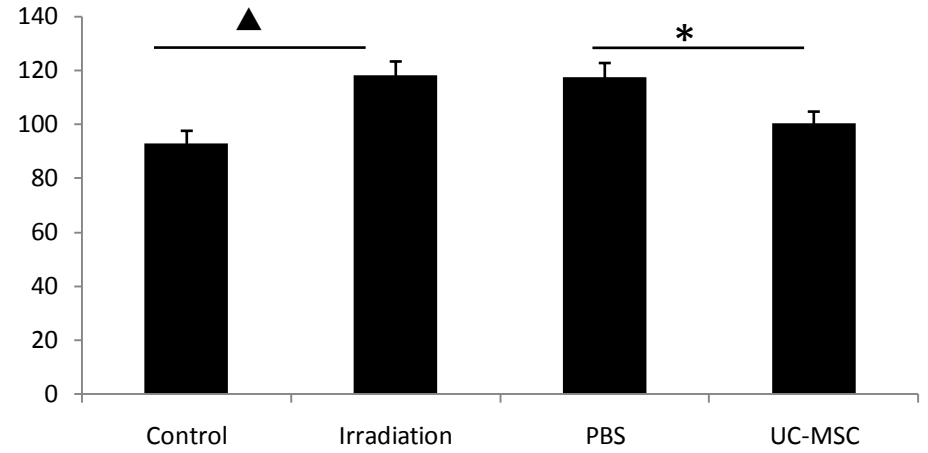

### BDNF

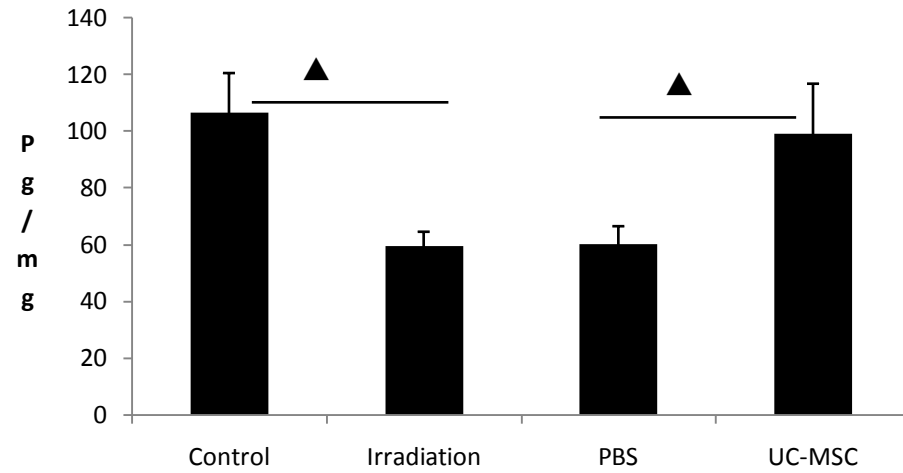

### GDNF

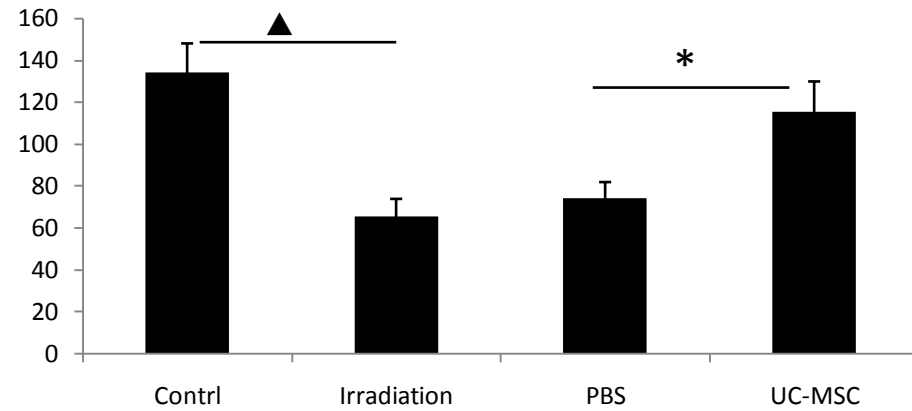

Supplement: MOESM9 [file 9766348]
